# Supplementary material
Source: ML conference proceedings conference paper supplement (https://openaccess.thecvf.com/content/ACCV2022/html/Baik_ST-CoNAL_Consistency-Based_Acquisition_ACCV_2022_paper.html)
Supplement: Supplementary file 1 [file Baik_ST-CoNAL_Consistency-Based_Acquisition_ACCV_2022_supplemental.pdf]

# Supplementary material for ST-CoNAL: Consistency-Based Acquisition Criterion Using Temporal Self-Ensemble for Active Learning

Jae Soon Baik<sup>[0000-0002-1508-0619]</sup>, In Young Yoon<sup>[0000-0003-3173-3947]</sup>, and  
Jun Won Choi<sup>[0000-0002-3733-0148]</sup>

Hanyang University, Seoul, Korea  
{jsbaik, inyoungyoon}@spa.hanyang.ac.kr, junwchoi@hanyang.ac.kr

## A Experimental Setup

In this section, we provide the detailed experimental setups. The configuration parameters used for ST-CoNAL are provided in Table 1. As for SSL setup, we followed the configurations used in [8].

| Dataset                                      | CIFAR-10 | CIFAR-100 | Caltech-256 | Tiny ImageNet |
|----------------------------------------------|----------|-----------|-------------|---------------|
| Initial learning rate ( $l_0$ )              | 0.1      | 0.1       | 0.01        | 0.005         |
| Nesterov momentum                            | 0.9      | 0.9       | 0.9         | 0.9           |
| Weight decay                                 | 0.0004   | 0.0004    | 0.001       | -             |
| Batch size                                   | 128      | 128       | 128         | 128           |
| Labeled batch size                           | 32       | 32        | 32          | 32            |
| Total epochs                                 | 200      | 200       | 200         | 100           |
| Size of unlabeled subset ( $ \mathcal{S} $ ) | 10k      | 20k       | 10k         | 20k           |
| Budget ( $b$ )                               | 1k       | 2k        | 1k          | 2k            |
| Size of initially labeled set                | 1k       | 2k        | 1k          | 2k            |
| Storing interval ( $c$ )                     | 10       | 10        | 10          | 10            |
| Learning rate decay ( $\gamma$ )             | 1.0      | 0.5       | 0.3         | 0.5           |
| Learning rate decay point ( $T_0$ )          | 160      | 160       | 160         | 60            |

Table 1: The configuration parameters used for ST-CoNAL.

## B Experimental Results

In the main manuscript, we used the performance gap from the random sampling baseline as a performance measure. To supplement this, we provide the absolute values of the average accuracy achieved by the AL methods. Fig. 1 (a) and (b) show the performance results evaluated on CIFAR-10 and CIFAR-100 datasets and Fig. 2 (a) and (b) represent those on Caltech-256 and Tiny ImageNet datasets.

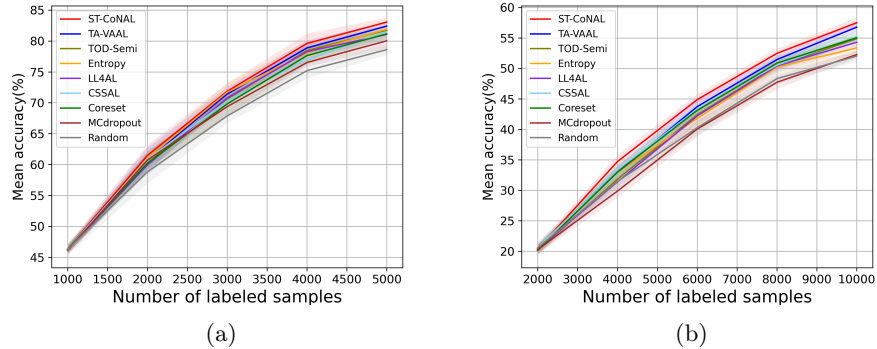

Fig. 1: Average test accuracy versus the number of labeled samples on (a) CIFAR-10 and (b) CIFAR-100 dataset.

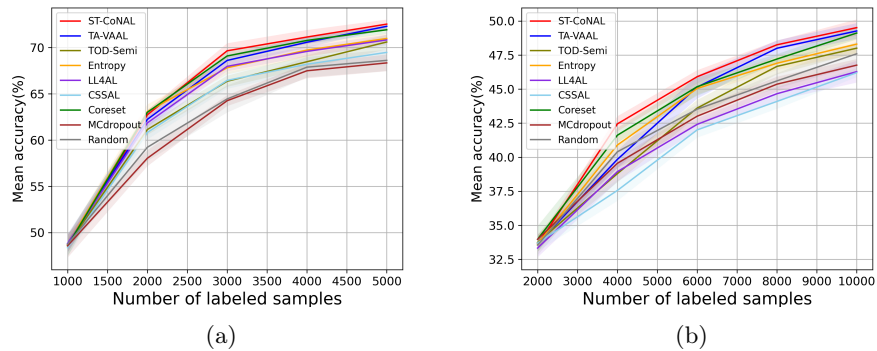

Fig. 2: Average test accuracy versus the number of labeled samples on (a) Caltech-256 and (b) Tiny ImageNet dataset.

## C Performance Comparison of AL Methods on Differently Imbalanced Datasets

In the main manuscript, we reported the performance of ST-CoNAL obtained on two imbalanced versions of CIFAR-10. In this section, we evaluate the algorithms on two differently imbalanced CIFAR-100 datasets, the step-imbalanced CIFAR-100 [2] and long-tailed CIFAR-100 [1,2]. The imbalance ratio was set to 100 for all cases. Fig. 3 (a) and (b) present the performance of ST-CoNAL on the step imbalanced CIFAR-100 [5] and the long-tailed CIFAR-100 [1], respectively. Even when different imbalance setups are used, ST-CoNAL consistently outperforms other AL methods. After the last acquisition step, ST-CoNAL achieves a performance improvement of 4.10% and 6.18% over the random sampling on the step-imbalanced CIFAR-100 and long-tailed CIFAR-100, respectively.

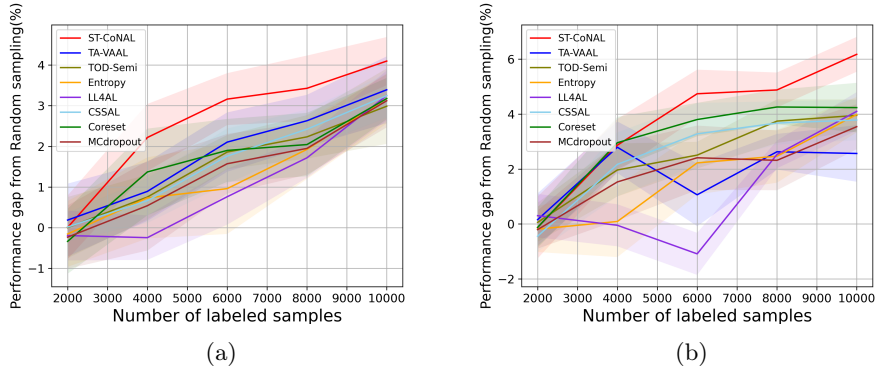

Fig. 3: Average accuracy improvement from random sampling versus the number of labeled samples on (a) the step imbalanced CIFAR-100 and (b) the long-tailed CIFAR-100. The imbalance ratio was set to 100 for both cases.

## D Performance Comparison of AL Methods With Different Backbones

In this section, we evaluate the performance of ST-CoNAL when VGG16 [7] and ResNet-50 [4] are used as a backbone network. Fig. 4 (a) and (b) show the performance of ST-CoNAL on CIFAR-10 and CIFAR-100 when VGG16 backbone is used. After the last acquisition step, ST-CoNAL achieves 2.95% and 4.65% performance gains over random sampling on CIFAR-10 and CIFAR-100, respectively. Fig. 5 presents the performance of ST-CoNAL when ResNet-50 backbone is used. ST-CoNAL achieves the performance improvement of 4.99% and 8.91% over random sampling on CIFAR-10 and CIFAR-100, respectively.

## E Performance Versus Other Parameters

We evaluate the performance of ST-CoNAL as a function of the budget sizes  $b$ , the number of student models  $Q$  and temperature parameter  $T$  on CIFAR-10. We try the different values of  $b \in \{500, 1k, 2k\}$ ,  $Q \in \{2, 4, 8, 10\}$ , and  $T \in \{0.3, 0.5, 0.7, 1.0\}$ . For the budget sizes  $b$ , we compare our ST-CoNAL with three competitive methods, Entropy [6], and TA-VAAL [3]. Table 2 provides the classification accuracy as a function of the acquisition step for different values of labeling budget  $b$ . The proposed ST-CoNAL maintains the performance gain over Entropy [6] and TA-VAAL [3] with different budget sizes. Additionally, we provide the performance of ST-CoNAL as a function of acquisition step versus the number of student models  $Q$  and temperature parameter  $T$ . Table 3 shows that ST-CoNAL achieves good performance for different  $Q$  and  $T$  values. For CIFAR-10 dataset, we set  $Q = 4$  and  $T = 0.7$  to provide decent performance.

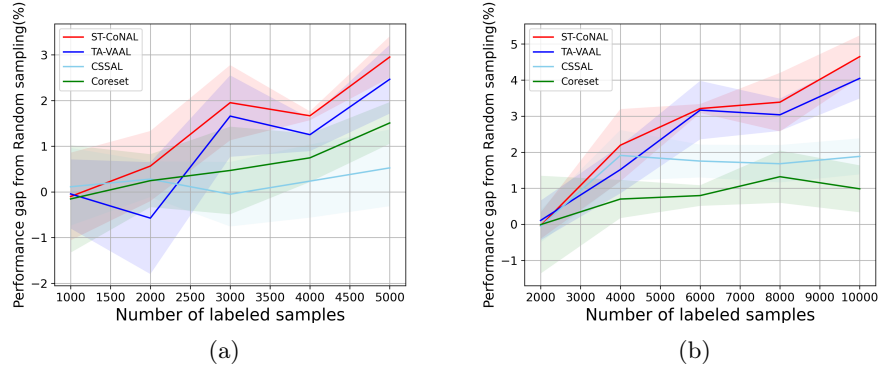

Fig. 4: Average accuracy improvement from random sampling versus the number of labeled samples evaluated on CIFAR-10 and (b) CIFAR-100. We evaluate the performance of AL methods using VGG16 backbone [7].

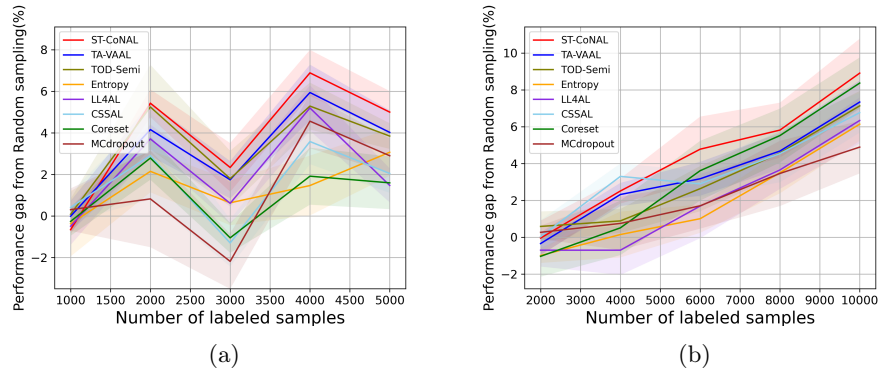

Fig. 5: Average accuracy improvement from random sampling versus the number of labeled samples evaluated on (a) CIFAR-10 and (b) CIFAR-100. We evaluate the performance of AL methods using ResNet-50 backbone [4].

| $b = 500$ | 1k samples labeled | 2k samples labeled | 3k samples labeled | 4k samples labeled | 5k samples labeled |
|-----------|--------------------|--------------------|--------------------|--------------------|--------------------|
| Entropy   | 46.83              | 59.29              | 68.33              | 76.10              | 81.16              |
| TA-VAAL   | 47.26              | 60.71              | 69.71              | 76.35              | 82.27              |
| ST-CoNAL  | 46.93              | <b>60.91</b>       | <b>70.39</b>       | <b>77.03</b>       | <b>83.40</b>       |
| $b = 1k$  | 1k samples labeled | 2k samples labeled | 3k samples labeled | 4k samples labeled | 5k samples labeled |
| Entropy   | 46.96              | 61.00              | 71.69              | 78.09              | 81.92              |
| TA-VAAL   | 46.94              | 60.79              | 71.40              | 78.87              | 82.40              |
| ST-CoNAL  | 47.13              | <b>61.48</b>       | <b>71.85</b>       | <b>79.61</b>       | <b>83.05</b>       |
| $b = 2k$  | 1k samples labeled |                    | 3k samples labeled |                    | 5k samples labeled |
| Entropy   | 47.19              |                    | 71.00              |                    | 81.29              |
| TA-VAAL   | 47.18              |                    | 71.22              |                    | 81.40              |
| ST-CoNAL  | 46.99              |                    | <b>72.48</b>       |                    | <b>82.53</b>       |

Table 2: Mean accuracy versus the number of labeled data samples as the function of budget size  $b$ .

| $Q$ | 1k samples labeled | 2k samples labeled | 3k samples labeled | 4k samples labeled | 5k samples labeled |
|-----|--------------------|--------------------|--------------------|--------------------|--------------------|
| 2   | 46.67              | 60.99              | 70.95              | 79.18              | 82.63              |
| 4   | 47.13              | 61.48              | <b>71.85</b>       | <b>79.61</b>       | 83.05              |
| 8   | 46.86              | <b>61.49</b>       | 71.77              | 79.23              | 82.83              |
| 10  | 46.70              | 61.37              | 71.64              | 79.40              | <b>83.14</b>       |
| $T$ | 1k samples labeled | 2k samples labeled | 3k samples labeled | 4k samples labeled | 5k samples labeled |
| 0.3 | 47.00              | 60.66              | 70.62              | 78.03              | 82.57              |
| 0.5 | 47.23              | 60.91              | 70.82              | 78.51              | 82.35              |
| 0.7 | 47.13              | <b>61.48</b>       | <b>71.85</b>       | 79.61              | <b>83.05</b>       |
| 1.0 | 46.87              | 60.91              | 71.41              | <b>79.78</b>       | 82.96              |

Table 3: Mean accuracy versus the number of labeled data samples as the function of the number of student models  $Q$  and temperature parameter  $T$ .

## References

1. Cao, K., Wei, C., Gaidon, A., Arechiga, N., Ma, T.: Learning imbalanced datasets with label-distribution-aware margin loss. In: Advances in Neural Information Processing Systems (NeurIPS). vol. 32 (2019)
2. Cui, Y., Jia, M., Lin, T.Y., Song, Y., Belongie, S.: Class-balanced loss based on effective number of samples. In: Proceedings of the IEEE/CVF Conference on Computer Vision and Pattern Recognition (CVPR). pp. 9268–9277 (2019)
3. Gao, M., Zhang, Z., Yu, G., Arik, S.Ö., Davis, L.S., Pfister, T.: Consistency-based semi-supervised active learning: Towards minimizing labeling cost. In: European Conference on Computer Vision (ECCV). pp. 510–526 (2020)
4. He, K., Zhang, X., Ren, S., Sun, J.: Deep residual learning for image recognition. In: Proceedings of the IEEE/CVF Conference on Computer Vision and Pattern Recognition (CVPR). pp. 770–778 (2016)
5. Kim, K., Park, D., Kim, K.I., Chun, S.Y.: Task-aware variational adversarial active learning. In: Proceedings of the IEEE/CVF Conference on Computer Vision and Pattern Recognition (CVPR). pp. 8166–8175 (2021)

6. Shannon, C.E.: A mathematical theory of communication. Bell system technical journal **27**(3), 379–423 (1948)
7. Simonyan, K., Zisserman, A.: Very deep convolutional networks for large-scale image recognition. In: International Conference on Learning Representations (ICLR) (2015)
8. Tarvainen, A., Valpola, H.: Mean teachers are better role models: Weight-averaged consistency targets improve semi-supervised deep learning results. In: Advances in Neural Information Processing Systems (NeurIPS). pp. 1195–1204 (2017)
